# Supplementary material for: Seasonal and Simultaneous Cleistogamy in Rostrate Violets (Viola, subsect. Rostratae, Violaceae)
Source: MDPI journal article supplement (doi:10.3390/plants10102147), 2021-10-10
Supplement: s1 [file s1]

**Table S1.** Mean number of CH and CL per plant of *Viola caspia* in particular months growing in Live Collection of Iranian Violets (Zanjan climate). Mean from five years observation. N = 20.

| CH flowers |         |          |       |       |     |      |      |        |                        |         |          |          |
|------------|---------|----------|-------|-------|-----|------|------|--------|------------------------|---------|----------|----------|
| Year       | January | February | March | April | May | June | July | August | September <sup>a</sup> | October | November | December |
| 2016       | 1       | 1        | 18    | 8     | 2   | 0    | 0    | 0      | 0                      | 0       | 0        | 0        |
| 2017       | 1       | 2        | 17    | 10    | 2   | 0    | 0    | 0      | 0                      | 0       | 0        | 0        |
| 2018       | 0       | 2        | 19    | 7     | 3   | 0    | 0    | 0      | 0                      | 0       | 0        | 0        |
| 2019       | 2       | 3        | 18    | 6     | 2   | 0    | 0    | 0      | 0                      | 0       | 0        | 0        |
| 2020       | 1       | 2        | 18    | 9     | 1   | 0    | 0    | 0      | 0                      | 0       | 0        | 0        |
| Mean       | 1       | 2        | 18    | 8     | 2   | 0    | 0    | 0      | 0                      | 0       | 0        | 0        |

  

| CL flowers  |   |   |    |   |     |   |   |   |   |   |   |   |
|-------------|---|---|----|---|-----|---|---|---|---|---|---|---|
| 2016        | 0 | 0 | 0  | 3 | 6   | 0 | 0 | 0 | 0 | 0 | 0 | 0 |
| 2017        | 0 | 0 | 1  | 5 | 5   | 0 | 0 | 0 | 0 | 0 | 0 | 0 |
| 2018        | 0 | 0 | 1  | 5 | 5   | 0 | 0 | 0 | 0 | 0 | 0 | 0 |
| 2019        | 0 | 0 | 2  | 4 | 4   | 0 | 0 | 0 | 0 | 0 | 0 | 0 |
| 2020        | 0 | 0 | 1  | 3 | 5   | 0 | 0 | 0 | 0 | 0 | 0 | 0 |
| Mean        | 0 | 0 | 1  | 4 | 5   | 0 | 0 | 0 | 0 | 0 | 0 | 0 |
| Mean        | 0 | 0 | 18 | 2 | 0.4 | 0 | 0 | 0 | 0 | 0 | 0 | 0 |
| CH/CL ratio |   |   |    |   |     |   |   |   |   |   |   |   |

<sup>a</sup> The plants gradually begin to fall from this month and are dormant in winter until January.

**Table S2.** Mean number of CH and CL per plant of *Viola caspia* in particular months growing in greenhouse conditions. Mean from five years observation. N = 20.

| CH flowers |         |          |       |       |     |      |      |        |           |         |          |          |
|------------|---------|----------|-------|-------|-----|------|------|--------|-----------|---------|----------|----------|
| Year       | January | February | March | April | May | June | July | August | September | October | November | December |
| 2016       | 17      | 20       | 23    | 16    | 12  | 0    | 0    | 0      | 0         | 0       | 0        | 0        |
| 2017       | 16      | 19       | 23    | 17    | 12  | 3    | 0    | 0      | 0         | 0       | 0        | 0        |
| 2018       | 16      | 18       | 22    | 17    | 10  | 2    | 0    | 0      | 0         | 0       | 0        | 0        |
| 2019       | 15      | 18       | 22    | 15    | 8   | 3    | 0    | 0      | 0         | 0       | 0        | 0        |
| 2020       | 16      | 19       | 24    | 14    | 8   | 2    | 0    | 0      | 0         | 0       | 0        | 0        |
| Mean       | 16      | 19       | 22    | 16    | 10  | 2    | 0    | 0      | 0         | 0       | 0        | 0        |

  

| CL flowers  |      |      |      |      |     |      |   |   |   |   |   |   |
|-------------|------|------|------|------|-----|------|---|---|---|---|---|---|
| 2016        | 10   | 13   | 11   | 13   | 11  | 8    | 6 | 0 | 1 | 0 | 4 | 7 |
| 2017        | 10   | 11   | 14   | 13   | 11  | 8    | 5 | 2 | 0 | 1 | 4 | 6 |
| 2018        | 8    | 12   | 12   | 12   | 11  | 6    | 7 | 1 | 0 | 1 | 4 | 7 |
| 2019        | 9    | 12   | 13   | 14   | 10  | 7    | 2 | 3 | 1 | 2 | 7 | 7 |
| 2020        | 8    | 12   | 10   | 13   | 7   | 6    | 5 | 4 | 3 | 1 | 6 | 8 |
| Mean        | 9    | 12   | 14   | 13   | 10  | 7    | 5 | 2 | 1 | 1 | 5 | 7 |
| Mean        | 1.77 | 1.58 | 1.57 | 1.23 | 1.0 | 0.28 | 0 | 0 | 0 | 0 | 0 | 0 |
| CH/CL ratio |      |      |      |      |     |      |   |   |   |   |   |   |

**Table S3.** Environmental conditions in particular month in Live Collection of Iranian Violets and in greenhouse during CH and CL flowering of *Viola caspia* (mean values from years 2015-2020).

| Live Collection of Iranian Violets |                  |              | Greenhouse       |              |
|------------------------------------|------------------|--------------|------------------|--------------|
| Month                              | Temp. [°C] daily | Humidity [%] | Temp. [°C] daily | Humidity [%] |
| January                            | 5.8              | 48.4         | 20.5             | 60.1         |
| February                           | 2.1              | 65.2         | 21.8             | 62.2         |
| March                              | 0.4              | 62           | 22.5             | 65.1         |
| April                              | 1.7              | 63           | 22.7             | 55.2         |
| May                                | 7.2              | 56           | 24.3             | 54.5         |
| June                               | 10.0             | 56           | 24.4             | 54.3         |
| July                               | 16.7             | 52.4         | 24.0             | 49.2         |
| August                             | 22.4             | 42           | 23.4             | 50.2         |
| September                          | 25.8             | 43.7         | 21.6             | 54.1         |
| October                            | 24.3             | 35           | 20.8             | 56.5         |
| November                           | 20.1             | 41.9         | 20.5             | 62.1         |
| December                           | 13.1             | 50.4         | 20.4             | 65.2         |
